# Supplementary material for: Time-dependent transformations of memory representations differ along the long axis of the hippocampus
Source: PubMed Central journal article supplement — Learn Mem. 2021 Sep;28(9):329–40. doi: 10.1101/lm.053438.121 (PMC8372564; doi:10.1101/lm.053438.121), 2021-09
Supplement: supp_28.9.329_Supplemental_FigureS1.pdf [file supp_28.9.329_Supplemental_FigureS1.pdf]

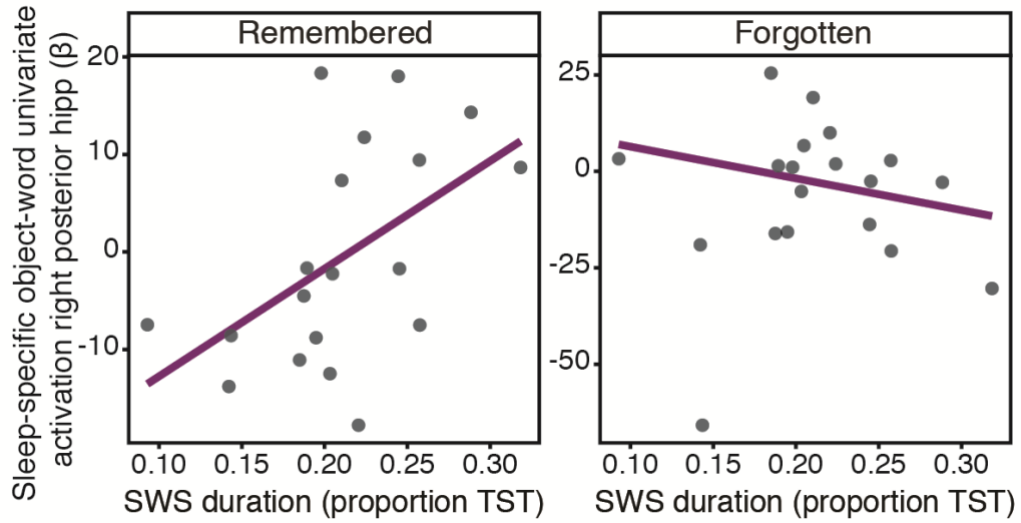

**Figure S1. Univariate activation correlates with duration of sleep stage**

The duration of Slow Wave Sleep (SWS, as proportion of total sleep time) positively correlated with the sleep-specific (SL-ML) univariate activation in right posterior hippocampus for subsequently remembered object-word pairs (left), but not those pairs that were forgotten (right).
