# Supplementary material for: Time-dependent transformations of memory representations differ along the long axis of the hippocampus
Source: PubMed Central journal article supplement — Learn Mem. 2021 Sep;28(9):329–40. doi: 10.1101/lm.053438.121 (PMC8372564; doi:10.1101/lm.053438.121), 2021-09
Supplement: supp_28.9.329_Supplemental_TableS1.pdf [file supp_28.9.329_Supplemental_TableS1.pdf]

| <b>Stage</b>            | <b>Minutes in Stage (SEM)</b> |
|-------------------------|-------------------------------|
| <b>Wake</b>             | 77.58 (8.09)                  |
| <b>Stage 1</b>          | 23.66 (2.46)                  |
| <b>Stage 2</b>          | 233.50 (7.78)                 |
| <b>SWS</b>              | 97.74 (5.97)                  |
| <b>REM</b>              | 108.24 (3.65)                 |
| <b>Total Sleep Time</b> | 463.13 (7.30)                 |

**Table S1. Average duration of sleep stages**

The average duration for each sleep stage and total sleep time (in minutes), with standard error of the mean in parentheses.
