# Supplementary material for: Time-dependent transformations of memory representations differ along the long axis of the hippocampus
Source: PubMed Central journal article supplement — Learn Mem. 2021 Sep;28(9):329–40. doi: 10.1101/lm.053438.121 (PMC8372564; doi:10.1101/lm.053438.121), 2021-09
Supplement: supp_28.9.329_Supplemental_TableS2.pdf [file supp_28.9.329_Supplemental_TableS2.pdf]

|                                                                          | Results without univariate   | Results with univariate  |
|--------------------------------------------------------------------------|------------------------------|--------------------------|
| <b>All trial Inter-Item Pattern Analysis</b>                             |                              |                          |
| <b>Scene vs. object comparison</b>                                       |                              |                          |
| Right posterior hippocampus                                              | $F(1,18)= 29.27, p < 0.0001$ | $X^2= 29.63, p < 0.0001$ |
| <b>List comparisons (object-word pairs)</b>                              |                              |                          |
| Left anterior hippocampus                                                |                              |                          |
| SL vs. SS                                                                | $t(18) = -3.1, p = 0.006$    | $X^2= 10.65, p = 0.001$  |
| ML vs. SS                                                                | $t(18) = -2.76, p = 0.013$   | $X^2= 8.2, p = 0.004$    |
| Left posterior hippocampus                                               |                              |                          |
| SL vs. SS                                                                | $t(18) = -3.11, p = 0.006$   | $X^2= 10.47, p = 0.001$  |
| ML vs. SS                                                                | $t(18) = -3.52, p = 0.002$   | $X^2= 14.87, p < 0.0001$ |
| Right anterior hippocampus                                               |                              |                          |
| SL vs. SS                                                                | $t(18)= -1.61, p = 0.06$     | $X^2= 4.40, p = 0.036$   |
| ML vs. SS                                                                | $t(18)= -1.61, p = 0.12$     | $X^2= 4.08, p = 0.043$   |
| <b>Anterior vs Posterior comparisons</b>                                 |                              |                          |
| Right hem: object-word                                                   | $F(1,18)= 5.58, p = 0.03$    | $X^2= 5.98, p = 0.014$   |
| Left hem: object-word                                                    | $F(1,18)= 8.48, p = 0.009$   | $X^2= 9.14, p = 0.003$   |
| Right hem: scene-word                                                    | $F(1,18)= 31.86, p < 0.001$  | $X^2= 35.42, p < 0.0001$ |
| Left hem: scene-word                                                     | $F(1,18)= 23.51, p = 0.0001$ | $X^2= 25.31, p < 0.0001$ |
| <b>Subsequent Memory Inter-Item Pattern Analysis (object-word pairs)</b> |                              |                          |
| <b>Right anterior hippocampus</b>                                        |                              |                          |
| SL rem vs. forg                                                          | $t(18) = -2.04, p = 0.057$   | $X^2= 3.88, p = 0.049$   |
| <b>Anterior vs. Posterior: rem</b>                                       | $t(18) = -2.55, p = 0.02$    | $X^2= 6.68, p = 0.01$    |

**Table S2. Influence of univariate activation on inter-item pattern analysis results**

For any significant comparisons for general or subsequent memory inter-item pattern similarity, we analyzed if the effect was maintained when accounting for differences in univariate activation. We conducted mixed effects linear regressions on a trial level basis. For the all trial inter-item pattern similarity, the factor of interest and activation were included in a model predicting similarity. We compared these to models *without* activation as a predictor, and created a contrast to confirm that the effects remained significant when the model accounted for univariate activation. All effects remained significant (column 1: without univariate, column 2: result with univariate).
